# Supplementary material for: Selectivity assessment in host–guest complexes from single-crystal X-ray diffraction data: the cavitand–alcohol case
Source: Royal Society of Chemistry journal article supplement (doi:10.1039/c4ce01813c), 2014-01-01

## **Selectivity assessment in host-guest complexes from single crystal X-ray diffraction data: The cavitand-alcohols case.**

Rita De Zorzi,<sup>a</sup> Giovanna Brancatelli,<sup>a</sup> Monica Melegari,<sup>b</sup> Roberta Pinalli,<sup>b</sup> Enrico Dalcanale,<sup>b</sup>  
Silvano Geremia<sup>a,\*</sup>

<sup>a</sup> Centro di Eccellenza in Biocristallografia, Dipartimento di Scienze Chimiche e Farmaceutiche, Università degli Studi di Trieste, via Licio Giorgieri 1, 34127 Trieste (Italy)

<sup>b</sup> Dipartimento di Chimica, Università degli Studi di Parma and INSTM Udr Parma, Parco Area delle Scienze 17A, 43124 Parma (Italy)

## **Supporting Information**

---

| <b>Contents</b>                                                                                                     | <b>page</b> |
|---------------------------------------------------------------------------------------------------------------------|-------------|
| <b>Table S1.</b> Unit cell parameters of crystals                                                                   | S2          |
| <b>Table S2.</b> Occupancy factors for alcoholic guests                                                             | S3          |
| <b>Table S3.</b> Ratios of the binding constants                                                                    | S4          |
| <b>Figure S1.</b> Structure and electron density map for the complex obtained in presence of MeOH/1-PrOH 0.20:0.80. | S4          |

---

**Table S1: Unit cell parameters of crystals of cavitand 1 grown in presence of the 32 alcoholic binary mixtures.**

| Structure             | $P 2_1/c$ |         |         |             |
|-----------------------|-----------|---------|---------|-------------|
|                       | a (Å)     | b (Å)   | c (Å)   | $\beta$ (°) |
| MeOH:EtOH 4:6 (1)     | 12.2869   | 21.9113 | 17.6501 | 104.2735    |
| MeOH:EtOH 4:6 (2)     | 12.3168   | 21.9755 | 17.6953 | 104.0978    |
| MeOH:EtOH 6:4         | 12.3045   | 21.9400 | 17.6361 | 104.2101    |
| MeOH:EtOH 8:2         | 12.2432   | 21.8836 | 17.6533 | 103.9962    |
| MeOH:1-PrOH 2:8       | 12.2656   | 21.9235 | 17.7920 | 103.8710    |
| MeOH:1-PrOH 4:6       | 12.2550   | 21.9946 | 17.7319 | 103.7852    |
| MeOH:1-PrOH 6:4       | 12.2918   | 21.9386 | 17.8245 | 104.1782    |
| MeOH:1-PrOH 8:2       | 12.2023   | 21.9788 | 17.7311 | 103.9392    |
| MeOH:2-PrOH 2:8       | 12.3825   | 21.8372 | 17.7391 | 105.0385    |
| MeOH:2-PrOH 4:6       | 12.2900   | 21.9072 | 17.7776 | 104.3076    |
| MeOH:1-BuOH 2:8       | 12.2846   | 22.0579 | 17.7281 | 105.1994    |
| EtOH:1-PrOH 2:8       | 12.3348   | 21.9096 | 17.7504 | 104.5037    |
| EtOH:1-PrOH 4:6       | 12.3182   | 21.8896 | 17.6667 | 104.3783    |
| EtOH:1-PrOH 6:4       | 12.3053   | 21.8672 | 17.6114 | 104.3707    |
| EtOH:2-PrOH 2:8       | 12.3736   | 21.9300 | 17.6903 | 104.9088    |
| EtOH:2-PrOH 4:6       | 12.3493   | 21.9209 | 17.6959 | 104.6636    |
| EtOH:2-PrOH 6:4 (1)   | 12.3560   | 22.0006 | 17.6515 | 104.4803    |
| EtOH:2-PrOH 6:4 (2)   | 12.3165   | 21.9261 | 17.6584 | 104.5299    |
| 1-PrOH:2-PrOH 2:8     | 12.4219   | 21.7781 | 17.8241 | 104.8786    |
| 1-PrOH:2-PrOH 4:6 (1) | 12.3383   | 21.8612 | 17.8079 | 104.3235    |
| 1-PrOH:2-PrOH 4:6 (2) | 12.3480   | 21.8835 | 17.7868 | 104.4537    |
| 1-PrOH:2-PrOH 6:4     | 12.3420   | 21.8601 | 17.8400 | 104.2637    |
| 1-PrOH:2-PrOH 8:2     | 12.3237   | 21.8917 | 17.8283 | 104.1339    |
| 1-PrOH:1-BuOH 2:8     | 12.3042   | 21.8544 | 17.8762 | 103.9091    |
| 1-PrOH:2-BuOH 2:8     | 12.4070   | 21.8138 | 17.8499 | 104.2039    |
| 1-PrOH:2-BuOH 4:6     | 12.3308   | 21.8214 | 17.8122 | 103.9154    |
| 2-PrOH:1-BuOH 2:8     | 12.3683   | 21.8461 | 17.8759 | 104.3928    |
| 2-PrOH:1-BuOH 6:4     | 12.4498   | 21.8497 | 17.7633 | 104.9914    |
| 2-PrOH:2-BuOH 2:8     | 12.5024   | 21.7654 | 17.8074 | 104.8721    |
| 2-PrOH:2-BuOH 4:6     | 12.4653   | 21.7958 | 17.7661 | 105.0446    |
| 1-BuOH:2-BuOH 4:6     | 12.4573   | 21.7456 | 17.8691 | 104.3873    |
| 1-BuOH:2-BuOH 6:4     | 12.4015   | 21.8886 | 17.9194 | 104.1694    |

**Table S2. Occupancy factors for alcoholic guests *A* and *B* obtained by conventional structural refinement ( $x_A$ ,  $x_B$ ) of the host-guest crystal structures. As comparison, the computed occupancy factor of the alcohol *A* ( $x_w^A$ ) is reported in the last column. For each structure the *R*-factor has been reported to attest the quality of the refined crystallographic model.**

| <i>A</i> | <i>B</i> | $\chi_A$ | $x_A$   | $x_B$   | <i>R</i> | $x_w^A$  |
|----------|----------|----------|---------|---------|----------|----------|
| MeOH     | EtOH     | 0.4 (1)  | 0.37(2) | 0.63(2) | 0.0597   | 0.163(2) |
| MeOH     | EtOH     | 0.4 (2)  | 0.37(2) | 0.63(2) | 0.0595   | 0.114(2) |
| MeOH     | EtOH     | 0.6      | 0.37(2) | 0.63(2) | 0.0516   | 0.120(2) |
| MeOH     | EtOH     | 0.8      | 0.44(4) | 0.56(4) | 0.1218   | 0.337(2) |
| MeOH     | 1-PrOH   | 0.2      | 0.46(1) | 0.54(1) | 0.0521   | 0.230(2) |
| MeOH     | 1-PrOH   | 0.4      | 0.56(1) | 0.44(1) | 0.0575   | 0.362(2) |
| MeOH     | 1-PrOH   | 0.6      | 0.47(1) | 0.53(1) | 0.0668   | 0.351(2) |
| MeOH     | 1-PrOH   | 0.8      | 0.40(2) | 0.60(2) | 0.0751   | 0.662(3) |
| MeOH     | 2-PrOH   | 0.2      | 0.34(1) | 0.66(1) | 0.0622   | 0.355(3) |
| MeOH     | 2-PrOH   | 0.4      | 0.61(1) | 0.39(1) | 0.0703   | 0.670(2) |
| MeOH     | 1-BuOH   | 0.2      | 0.65(2) | 0.35(2) | 0.0981   | 0.772(4) |
| EtOH     | 1-PrOH   | 0.2      | 0.75(2) | 0.25(2) | 0.0683   | 0.555(3) |
| EtOH     | 1-PrOH   | 0.4      | 0.83(1) | 0.17(1) | 0.0656   | 0.770(2) |
| EtOH     | 1-PrOH   | 0.6      | 0.89(1) | 0.11(1) | 0.1247   | 0.832(2) |
| EtOH     | 2-PrOH   | 0.2      | 0.65(1) | 0.35(1) | 0.0844   | 0.753(3) |
| EtOH     | 2-PrOH   | 0.4      | 0.73(1) | 0.27(1) | 0.0739   | 0.891(2) |
| EtOH     | 2-PrOH   | 0.6 (1)  | 0.77(1) | 0.23(1) | 0.0683   | 0.877(2) |
| EtOH     | 2-PrOH   | 0.6 (2)  | 0.75(1) | 0.25(1) | 0.0743   | 0.933(2) |
| 1-PrOH   | 2-PrOH   | 0.2      | 0.30(1) | 0.70(1) | 0.0565   | 0.382(2) |
| 1-PrOH   | 2-PrOH   | 0.4 (1)  | 0.44(1) | 0.56(1) | 0.0870   | 0.580(3) |
| 1-PrOH   | 2-PrOH   | 0.4 (2)  | 0.49(1) | 0.51(1) | 0.0562   | 0.632(2) |
| 1-PrOH   | 2-PrOH   | 0.6      | 0.56(1) | 0.44(1) | 0.0665   | 0.769(2) |
| 1-PrOH   | 2-PrOH   | 0.8      | 0.76(1) | 0.24(1) | 0.0824   | 0.859(2) |
| 1-PrOH   | 1-BuOH   | 0.2      | 0.41(2) | 0.59(2) | 0.0748   | 0.822(3) |
| 1-PrOH   | 2-BuOH   | 0.2      | 0.63(1) | 0.37(1) | 0.0699   | 0.621(2) |
| 1-PrOH   | 2-BuOH   | 0.4      | 0.76(1) | 0.24(1) | 0.0626   | 0.834(2) |
| 2-PrOH   | 1-BuOH   | 0.2      | 0.45(1) | 0.55(1) | 0.0784   | 0.563(2) |
| 2-PrOH   | 1-BuOH   | 0.6      | 0.82(1) | 0.18(1) | 0.0628   | 0.961(1) |
| 2-PrOH   | 2-BuOH   | 0.2      | 0.38(2) | 0.62(2) | 0.0703   | 0.525(2) |
| 2-PrOH   | 2-BuOH   | 0.4      | 0.71(2) | 0.29(2) | 0.0695   | 0.698(2) |
| 1-BuOH   | 2-BuOH   | 0.4      | 0.31(2) | 0.59(2) | 0.0933   | 0.192(2) |
| 1-BuOH   | 2-BuOH   | 0.6      | 0.45(1) | 0.55(1) | 0.0798   | 0.464(3) |

Table S3. Ratios of the binding constants ( $K_A/K_B$ ) for the cavitand Ti<sup>III</sup>[H,CH<sub>3</sub>,CH<sub>3</sub>] site, calculated for each pair of alcohols. The  $K_A/K_B$  values are the mean values of the ratios reported in Table 2.

| $K_A/K_B$             | <i>Guest A</i> |         |          |          |          |          |
|-----------------------|----------------|---------|----------|----------|----------|----------|
|                       | MeOH           | EtOH    | 1-PrOH   | 2-PrOH   | 1-BuOH   | 2-BuOH   |
| MeOH                  |                | 5.68(7) | 1.38(2)  | 0.381(3) | 0.07(2)  |          |
| EtOH                  | 0.176(2)       |         | 0.225(3) | 0.104(3) |          |          |
| 1-PrOH                | 0.724(8)       | 4.44(6) |          | 0.461(6) | 0.054(1) | 0.142(1) |
| <i>Guest B</i> 2-PrOH | 2.62(2)        | 9.6(2)  | 2.17(2)  |          | 0.09(3)  | 0.254(3) |
| 1-BuOH                | 13.5(3)        |         | 18.5(4)  | 10.8(3)  |          | 2.14(3)  |
| 2-BuOH                |                |         | 7.04(7)  | 3.94(4)  | 0.467(6) |          |

Figure S1. Structure and electron density map (contour level:  $1\sigma$ ) for the host-guest complex obtained in presence of the alcohol pair MeOH/1-PrOH 0.20:0.80.

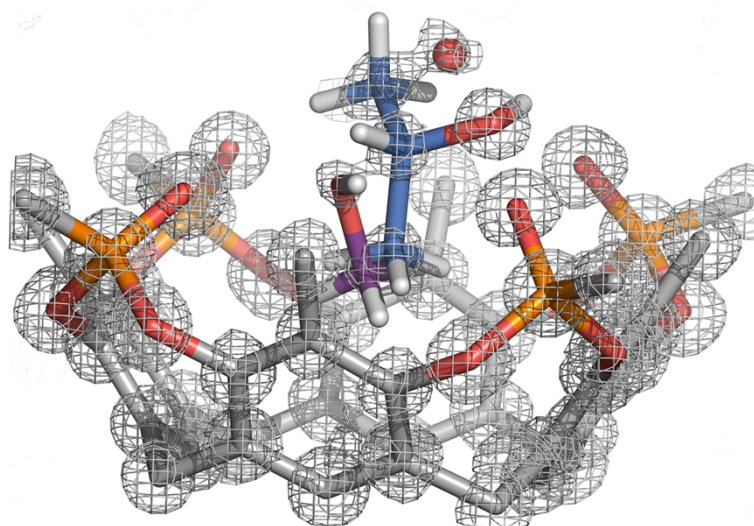

Supplement: c4ce01813c1.pdf [file c4ce01813c1.pdf]
